# Supplementary material for: MKK6 deficiency promotes cardiac dysfunction through MKK3-p38γ/δ-mTOR hyperactivation
Source: PubMed Central journal article supplement (PMC9381040; doi:10.7554/elife.75250), 2022-08-16

**Figure 7 - figure supplement 2B**

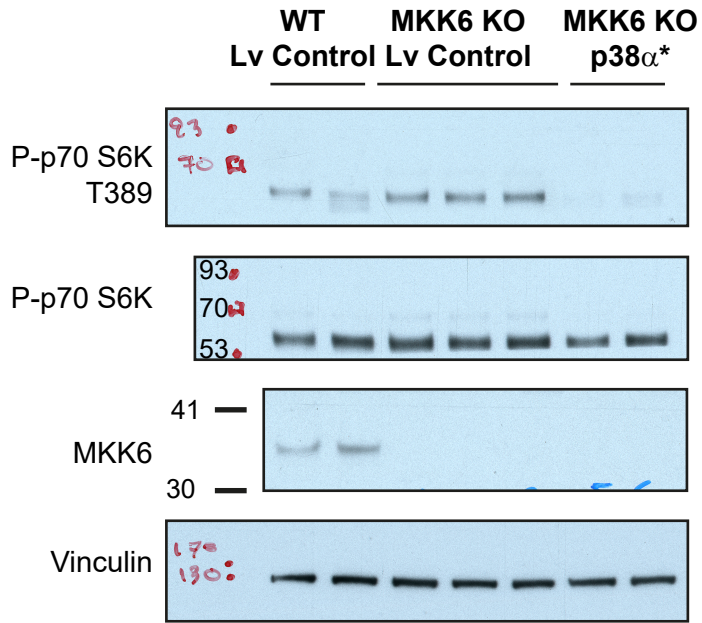

Supplement: elife-75250-fig7-figsupp2-data1.pdf [file elife-75250-fig7-figsupp2-data1.pdf]
