# Supplementary material for: MKK6 deficiency promotes cardiac dysfunction through MKK3-p38γ/δ-mTOR hyperactivation
Source: eLife journal article supplement (doi:10.7554/elife.75250), 2022-07-11

**Figure 5 - figure supplement 2A**

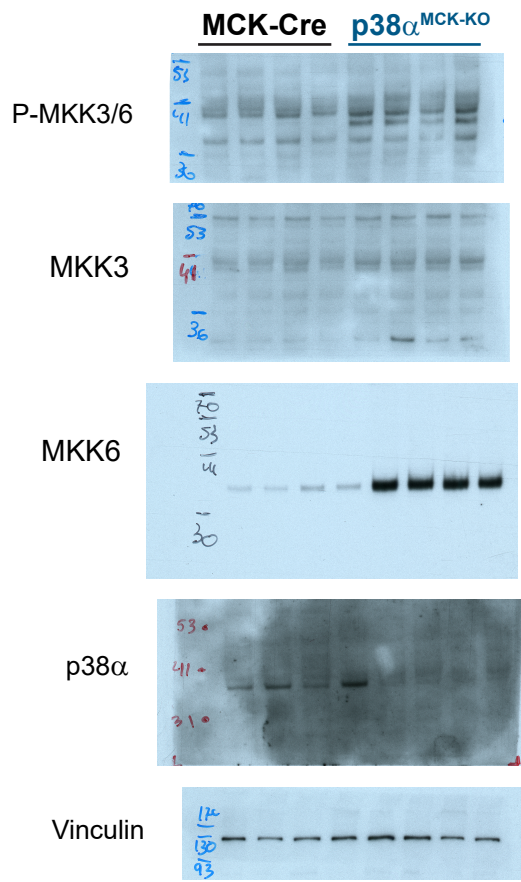

**Figure 5 - figure supplement 2C**

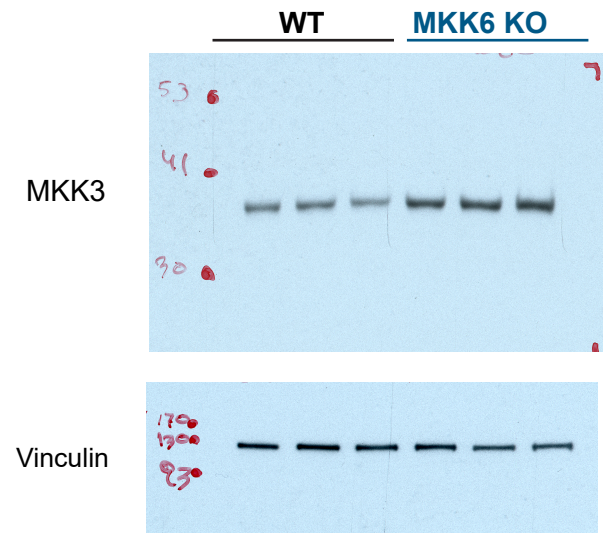

Supplement: fig5-figsupp2-data1 [file elife-75250-fig5-figsupp2-data1-v1.pdf]
