# Supplementary material for: MKK6 deficiency promotes cardiac dysfunction through MKK3-p38γ/δ-mTOR hyperactivation
Source: eLife journal article supplement (doi:10.7554/elife.75250), 2022-07-11

**Figure 7 - figure supplement 1A**

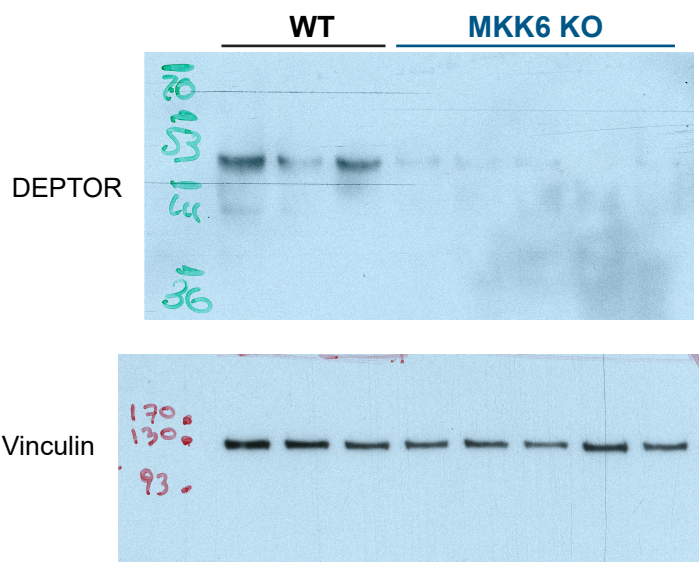

Supplement: fig7-figsupp1-data1 [file elife-75250-fig7-figsupp1-data1-v1.pdf]
