# Supplementary material for: MKK6 deficiency promotes cardiac dysfunction through MKK3-p38γ/δ-mTOR hyperactivation
Source: eLife. 2022 Aug 16;11:e75250. doi: 10.7554/eLife.75250 (PMC9381040; doi:10.7554/eLife.75250)
Supplement: Figure 1—source data 1. [file elife-75250-fig1-data1.xlsx]

## Sheet: Figure 1B
		Body weight (g)
		WT															MKK6 KO
	1-1.5 months	17.6	18.4	19.5	18.4	17.3	15.5	19	18.5	18.7	19	15	14.75	15.1	16.4	17.2	12.4	10.6	10.8	10.7	11.7	11.3	10	7.5	12.74	11.4	13.8
	2-4 months	28.4	27.2	24	24.6	26.6	27.8	27.1	30.2	27.7	26.2	21.9	24.7	24.6	25.5	26.6	23.7	24.5	22.4	23.6	21.2	21.4	22.4	25.7	23.2	18.8	22.1	20.2	18.7	11.3	16.1	18.6
	7-9 months	31.1	30	32.2	34.4	30.6	36.7	29.1	33	31.7	34.5	32.8	36.9	31.9			20.5	20.4	23.2	22.9
	18-20 months	31.7	31.9	34.5	33.7	37.7	32.7	31.2	33	36.3	34						23.8	16.7	23.8	12.55	23.1	23.1	19.8	14.9
	Figure 1B
	Figure ID	Normality	(Non-)Parametric testing	Post-hoc test				Effective
				Test	Comparison	Summary	P-value	Group	n
	Figure 1B	No	2-way ANOVA	Sidak's multiple comparisons test	P-interaction between age and genotype	***	<0.0001	WT 1-1,5 months	15
					P-genotype	***	<0.0001	MKK6 KO 1-1,5 months	11
					P-age	***	<0.0001	WT 2-4 months	15
					MKK6 KO vs WT 1-1,5 months	***	<0.0001	MKK6 KO 2-4 months	16
					MKK6 KO vs WT 2-4 months	***	<0.0001	WT 7-9 months	13
					MKK6 KO vs WT 7-9 months	***	<0.0001	MKK6 KO 7-9 months	4
					MKK6 KO vs WT 18-20 months	***	<0.0001	WT 18-20 months	10
								MKK6 KO 18-20 months	8

## Sheet: Figure 1C
	TL (mm)			BW/TL (g/mm)			sWAT weight/TL (mg/mm)			eWAT weight/TL (mg/mm)
	WT	MKK6 KO		WT	MKK6 KO		WT	MKK6 KO		WT	MKK6 KO
	17.65	18.34		1.617	1.21538		13.6714	3.68593		32.3683	3.31516
	17.7	17.1		1.56441	0.701754		7.65537	2.05263		24.0565	0
	18.56	18.16		1.62608	1.07489		8.93319	4.96696		28.4914	5.35793
	18.5	17.78		1.78919	1.27109		13.3622	8.28459		40.2865	6.64792
	17.95	17.38		1.84067	0.880322		19.1031	3.19908		49.0306	0
	18.62	17.97		1.63265	1.335		9.2159	3.50584		31.4608	8.4975
	18.39	18.52		1.78902	0.931425		11.8651	2.59179		31.6096	0
	17.88	16.87		1.69463	0.906935		14.9441	3.80557		25.2629	0
	18.73	18.68		1.58035	1.00803		7.5921			30.897
	17.57	18.91		1.64485	1.29561		11.9579			33.0962
	18.22			1.5258
	Figure 1C
	Figure ID	Normality	(Non-)Parametric testing	Post-hoc test				Effective
				Comparison		Summary	P-value	Group	n
	Figure 1C Tibia length	Yes	Unpaired t-test	MKK6 KO vs WT		ns	0.4497	WT	11
								MKK6 KO	10
	Figure 1C body weight/tibia length	Yes	Unpaired t-test	MKK6 KO vs WT		***	<0.0001	WT	11
								MKK6 KO	10
	Figure 1C sWAT weight/tibia length	Yes	Unpaired t-test	MKK6 KO vs WT		***	<0.0001	WT	10
								MKK6 KO	8
	Figure 1C eWAT weight/tibia length	No	Mann Whitney test	MKK6 KO vs WT		***	<0.0001	WT	10
								MKK6 KO	8

## Sheet: Figure 1D
	Kyphosis angle (degrees)				Figure 1D
	WT	MKK6 KO			Figure ID	Normality	(Non-)Parametric testing	Post-hoc test				Effective
	133.632	94.512						Comparison		Summary	P-value	Group	n
	125.522	116.049			Figure 1D	Yes	Unpaired t-test	MKK6 KO vs WT		**	0.0049	WT	5
	134.027	102.978										MKK6 KO	5
	129.979	74.019
	111.282	80.321

## Sheet: Figure 1E
	Weeks	WT	MKK6 KO
	105	0
	104	1
	105	0
	105	0
	105	0
	105	0
	105	0
	105	0
	96	1
	96	1			Figure 1E
	103	1			Figure ID	Test	Comparison	Summary	P-value	Effective
	105	0								Group	n
	105	0			Figure 1E	Gehan-Breslow-Wilcoxon test	MKK6 KO vs WT	***	<0.0001	WT	30
	105	0								MKK6 KO	33
	105	0
	105	0
	105	0
	105	0
	105	0
	105	0
	105	0
	105	0
	89	1
	72	1
	73	1
	105	0
	105	0
	105	0
	105	0
	105	0
	105		1
	105		0
	105		0
	75		1
	83		1
	101		1
	105		0
	80		1
	99		1
	105		0
	76		1
	105		1
	99		1
	68		1
	52		1
	105		0
	105		0
	105		0
	105		0
	51		1
	58		1
	61		1
	67		1
	66		1
	66		1
	69		1
	65		1
	65		1
	65		1
	65		1
	65		1
	64		1
	77		1
