# Supplementary material for: MKK6 deficiency promotes cardiac dysfunction through MKK3-p38γ/δ-mTOR hyperactivation
Source: eLife. 2022 Aug 16;11:e75250. doi: 10.7554/eLife.75250 (PMC9381040; doi:10.7554/eLife.75250)
Supplement: Figure 2—source data 1. [file elife-75250-fig2-data1.xlsx]

## Sheet: Figure 2A
	LV wall thickness;d (mm)			LVID;d (mm)			LVID;s (mm)			LV volume;d (µL)			LV volume;s (µL)
	WT	MKK6 KO		WT	MKK6 KO		WT	MKK6 KO		WT	MKK6 KO		WT	MKK6 KO
	0.941719	0.941719		4.18031	4.0425		3.29219	3.12375		77.7102	71.7784		43.8806	38.6272
	1.04125	0.719688		4.0425	4.5325		2.94	3.675		71.7784	94.0203		33.3119	57.1905
	0.872812	0.964688		4.34875	4.9		3.00125	3.70562		85.3037	112.814		35.0357	58.3381
	0.903438	0.811562		4.14969	3.49125		3.0625	2.78688		76.3702	50.5631		36.8074	29.2109
	1.00297	0.91875		4.11906	4.74688		3.01656	3.85875		75.0427	104.762		35.4741	64.2614
	0.949375	0.79625		3.90469	4.0425		2.64906	2.75625		66.0987	71.7784		25.7729	28.4263
	0.872812	0.872812		3.85875	4.59375		2.35812	3.73625		64.2614	97.0264		19.2914	59.4981
	0.964688	0.750313		4.50188	4.59375		3.49125	3.49125		92.5361	97.0264		50.5631	50.5631
		0.98			4.47125			3.5525			91.0645			52.7231
		0.8575			4.44062			3.33812			89.6055			45.377
		1.04125			5.20625			4.41			129.868			88.159
		0.91875			4.165			3.24625			77.0386			42.4115
		0.719688			4.655			3.61375			100.083			54.9322
	Figure 2A
	Figure ID	Normality	(Non-)Parametric testing	Post-hoc test				Effective
				Comparison		Summary	P-value	Group	n
	Figure 2A LV wall thickness	Yes	Unpaired t-test	MKK6 KO vs WT		ns	0.0795	WT	8
								MKK6 KO	13
	Figure 2A LVID;d	Yes	Unpaired t-test	MKK6 KO vs WT		ns	0.0744	WT	8
								MKK6 KO	13
	Figure 2A LVID;s	Yes	Unpaired t-test	MKK6 KO vs WT		*	0.0133	WT	8
								MKK6 KO	13
	Figure 2A LV volume;d	Yes	Mann Whitney test	MKK6 KO vs WT		ns	0.0619	WT	8
								MKK6 KO	13
	Figure 2A LV volume;s	Yes	Mann Whitney test	MKK6 KO vs WT		*	0.0157	WT	8
								MKK6 KO	13

## Sheet: Figure 2B
	Ejection fraction (%)			Fractional shortening (%)			E/A wave velocities ratio (relative units)			Isovolumetric relaxation time (ms)
	WT	MKK6 KO		WT	MKK6 KO		WT	MKK6 KO		WT	MKK6 KO
	43.533	46.1855		21.2454	22.7273		1.11628	1.80275		35	19.583
	53.5907	39.1722		27.2727	18.9189		1.10989	0.834004		29.167	25
	58.9283	48.2883		30.9859	24.375		1.09106	1.06503		22.5	22.5
	51.804	42.2288		26.1993	20.1754		1.42181	1.04905		30	22.083
	52.7281	38.6598		26.7658	18.7097		1.08868	1.21739		25	24.167
	61.0084	60.3972		32.1568	31.8182		1.10632	1.25641		17.917	20.833
	69.9799	38.6785		38.8889	18.6667		1.4417	1.11247		24.167	30
	45.3586	47.8873		22.449	24		1.336	1.04132		18.75	25
		42.1036			20.5479			0.933921			21.667
		49.3591			24.8276			1.14003			20.833
		32.1165			15.2941			1.39174			18.947
		44.9477			22.0588			1.10314			22.5
		45.1133			22.3684						20.833
	Figure 2B
	Figure ID	Normality	(Non-)Parametric testing	Post-hoc test				Effective
				Comparison		Summary	P-value	Group	n
	Figure 2B Ejection fraction	Yes	Unpaired t-test	MKK6 KO vs WT		**	0.0064	WT	8
								MKK6 KO	13
	Figure 2B Fractional shortening	Yes	Unpaired t-test	MKK6 KO vs WT		**	0.0073	WT	8
								MKK6 KO	13
	Figure 2B E/A wave velocities ratio	No	Mann Whitney test	MKK6 KO vs WT		ns	0.3431	WT	8
								MKK6 KO	12
	Figure 2B Isovolumetric relaxation time	Yes	Unpaired t-test	MKK6 KO vs WT		ns	0.1712	WT	8
								MKK6 KO	13

## Sheet: Figure 2C
	Heart rate (bpm)				Figure 2C
	WT	MKK6 KO			Figure ID	Normality	(Non-)Parametric testing	Post-hoc test				Effective
	592.98	388.696						Comparison		Summary	P-value	Group	n
	589.338	330.142			Figure 2C	Yes	Unpaired t-test	MKK6 KO vs WT		*	0.0107	WT	9
	538.571	446.879										MKK6 KO	7
	487.746	493.987
	643.72	549.595
	579.016	489.068
	571.613	619.92
	616.908
	611.837

## Sheet: Figure 2D
	Picrosirius red positive area (%)				Figure 2D
	WT	MKK6 KO			Figure ID	Normality	(Non-)Parametric testing	Post-hoc test				Effective
	1.48671	2.07183						Comparison		Summary	P-value	Group	n
	1.82997	3.26803			Figure 2D	No	Mann Whitney test	MKK6 KO vs WT		*	0.0426	WT	8
	1.83861	2.1094										MKK6 KO	6
	1.9702	2.089
	2.53598	2.06323
	3.1823	3.2582
	1.9971
	1.99026

## Sheet: Figure 2E
	Systolic blood pressure (mmHg)			Diastollic blood pressure (mmHg)
	WT	MKK6 KO		WT	MKK6 KO
	592.98	388.696		592.98	388.696
	589.338	330.142		589.338	330.142
	538.571	446.879		538.571	446.879
	487.746	493.987		487.746	493.987
	643.72	549.595		643.72	549.595
	579.016	489.068		579.016	489.068
	571.613	619.92		571.613	619.92
	616.908			616.908
	611.837			611.837
	Figure 2E
	Figure ID	Normality	(Non-)Parametric testing	Post-hoc test				Effective
				Comparison		Summary	P-value	Group	n
	Figure 2E Systolic blood pressure	Yes	Unpaired t-test	MKK6 KO vs WT		ns	0.2203	WT	9
								MKK6 KO	7
	Figure 2E Diastolic blood pressure	Yes	Unpaired t-test	MKK6 KO vs WT		ns	0.4969	WT	9
								MKK6 KO	7
