# Supplementary material for: MKK6 deficiency promotes cardiac dysfunction through MKK3-p38γ/δ-mTOR hyperactivation
Source: eLife. 2022 Aug 16;11:e75250. doi: 10.7554/eLife.75250 (PMC9381040; doi:10.7554/eLife.75250)
Supplement: Figure 3—source data 1. [file elife-75250-fig3-data1.xlsx]

## Sheet: Figure 3A
	LV mass (mg)			LVID;d (mm)			LVPW;d (mm)			IVS;d (mm)
	WT	MKK6 KO		WT	MKK6 KO		WT	MKK6 KO		WT	MKK6 KO
	67.3493	98.9381		3.48491	4.1819		0.675862	0.718103		0.802586	0.92931
	86.6738	103.17		4.01293	3.97069		0.749784	0.92931		0.749784	1.01379
	98.3238	134.412		4.04109	4.30862		0.689943	0.844828		0.943391	1.09828
	82.3523	132.066		4.12558	4.64655		0.92931	0.718103		0.971552	1.01379
	89.7507	154.023		3.29483	4.47759		1.01379	0.887069		0.802586	1.1194
	90.0543	188.75		4.09741	5.06897		0.675862	1.05603		0.823707	1.05603
	81.547	117.796		3.88621	4.51983		0.675862	0.802586		0.92931	0.823707		Figure 3A
	83.3209	97.8475		4.09741	4.26638		0.675862	0.718103		0.718103	0.802586		Figure ID	Normality	(Non-)Parametric testing	Post-hoc test			Effective
	85.23	112.167		4.05517	4.43534		0.760345	0.844828		0.675862	0.938282					Comparison	Summary	P-value	Group	n
	103.373	132.309		3.92845	4.35086		0.760345	0.92931		0.760345	0.92931		Figure 3A LV Mass	Yes	Unpaired t-test	MKK6 KO vs WT	***	<0.0001	WT	43
	98.9131	84.0695		4.22414	3.98125		0.802586	0.663542		0.802586	0.816667								MKK6 KO	36
	91.3402	106.179		3.31771	4.47759		0.969792	0.760345		1.07187	0.760345		Figure 3A LVID;d	Yes	Unpaired t-test	MKK6 KO vs WT	***	<0.0001	WT	44
	88.1998	89.9716		4.32974	3.93021		0.696983	0.663542		0.718103	0.91875								MKK6 KO	36
	78.6492	179.712		4.04373	4.2875		0.695223	1.02083		0.809626	1.32708		Figure 3A LVPW;d	No	Mann-Whitney test	MKK6 KO vs WT	*	0.04	WT	44
	70.5714	161.234		3.64244	4.68879		0.718543	0.950431		0.852308	1.01379								MKK6 KO	36
	68.2751	167.335		3.56236	4.31302		0.745091	1.07187		0.745091	1.14844		Figure 3A IVS;d	Yes	Unpaired t-test	MKK6 KO vs WT	***	<0.0001	WT	44
	103.147	103.537		3.45206	3.41979		0.728077	0.867708		0.782052	1.17396								MKK6 KO	36
	55.8381	87.7702		4.1599	4.1819		0.740104	0.675862		0.893229	0.760345
	78.1601	73.8846		3.71724	4.05517		0.506897	0.506897		0.675862	0.802586
	69.0083	96.2224		3.94957	4.22414		0.633621	0.675862		0.781466	0.844828
	69.0626	103.373		3.80172	4.22414		0.633621	0.760345		0.718103	0.844828
	94.9401	123.59		4.09741	4.08		0.549138	0.88		0.675862	1.02
	74.6937	101.3		4.01293	4.18		0.718103	0.82		0.887069	0.78
	68.5288	134.04		4.1819	5.27		0.718103	0.71		0.549138	0.75
	67.8363	174.15		3.92845	4.63		0.696983	0.99		0.591379	1.12
	73.3925	115.48		4.05517	3.91		0.549138	0.88		0.675862	1.02
	71.2746	128.6		3.75948	4.18		0.718103	0.95		0.718103	0.95
	111.98	150.83		3.97069	4.05		0.633621	1.09		0.675862	1.12
	98.24	88.62		3.78	3.91		1.16	1.05		0.78	1.02
	96.93	125.25		4.25	4.12		0.68	0.92		0.85	0.99
	97.29	91.74		3.74	4.08		0.92	0.68		0.85	0.85
	124.71	108.03		4.01	4.42		0.78	0.75		0.85	0.82
	114.55	114.27		3.74	4.42		1.05	0.78		1.05	0.85
	99.94	148.39		4.29	4.18		0.82	1.16		0.88	0.95
	94.56	120.47		4.15	4.49		0.78	0.75		0.82	0.92
	122.46	137.24		4.01	4.49		0.78	1.05		0.82	0.78
	115.92			3.27			1.22			1.16
	115.18			4.05			0.99			0.85
	96.72			3.84			0.92			1.02
	130.47			3.44			1.02			0.92
	92.55			3.91			1.05			1.02
	115.62			4.49			0.68			0.65
	96.35			4.49			0.87			0.81
				4.36			0.71			0.75

## Sheet: Figure 3B
	Ejection fraction (%)			Cardiac output (mL/min)			Stroke volume (µL)			E/A wave velocities ratio (relative units)
	WT	MKK6 KO		WT	MKK6 KO		WT	MKK6 KO		WT	MKK6 KO		Figure 3B
	63.0833	49.2133		10.0499	13.4858		21.4713	32.5627		1.46963	1.62735		Figure ID	Normality	(Non-)Parametric testing	Post-hoc test			Effective
	56.1943	51.968		9.97298	14.6123		22.8132	32.3957		1.63859	2.11794					Comparison	Summary	P-value	Group	n
	43.0501	56.6797		11.767	9.87022		28.3757	20.4396		1.39875	1.48991		Figure 3B Ejection fraction	Yes	Student's t-test	MKK6 KO vs WT	ns	0.5942	WT	53
	51.9528	52.8044		11.4817	16.0922		24.4984	31.5475		1.54	1.67449								MKK6 KO	46
	45.1831	67.9995		9.84826	30.0157		22.3672	54.3826		1.598	1.47346		Figure 3B Cardiac output	No	Mann-Whitney test	MKK6 KO vs WT	***	0.0009	WT	37
	48.31	40.6603		12.498	21.2874		30.9143	44.8291		1.49765	2.1526								MKK6 KO	30
	67.5308	63.832		16.7078	22.4252		31.1879	48.0179		1.678	1.74723		Figure 3B Stroke volume	No	Mann-Whitney test	MKK6 KO vs WT	***	0.0003	WT	37
	51.6335	64.1439		16.5595	13.3666		28.3581	24.4312		1.32847	1.6621								MKK6 KO	29
	66.9709	59.4976		21.4514	7.67378		38.8509	29.2075		1.6628	1.5814		Figure 3B E/A wave velocities ratio	No	Mann-Whitney test	MKK6 KO vs WT	ns	0.1809	WT	54
	64.647	48.5185		12.5334	14.2235		22.2425	28.8614		1.16097	1.31853								MKK6 KO	45
	44.7985	48.9655		11.2841	15.2487		18.1251	23.7915		1.18481	1.21989
	37.7307	50.374		7.80887	10.8434		14.6932	25.7867		1.12389	1.95506
	46.0251	65		10.2739	13.9623		23.9331	47.932		1.28596	1.116
	45.5977	43.769		10.3698	23.4013		21.8667	15.864		1.07911	1.17423
	42.1335	43.0395		7.58895	7.99027		14.5692	20.2596		1.38631	1.1561
	53.8444	38.2786		7.28014	7.80885		15.167	32.4765		1.20803	1.1952
	35.0991	51.1567		5.88434	17.4729		12.6309	25.0136		1.10309	1.09259
	39.4651	53.4699		12.7774	10.7425		25.568	27.3139		1.12156	1.80386
	37.2615	25.2026		5.50876	13.7548		11.8305	29.0843		1.34483	1.31453
	47.4156	26.2059		5.41562	13.1765		12.0855	31.0406		1.4485	1.23719
	40.6763	48.1701		6.72294	16.3252		15.2106	20.293		1.31302	1.65
	39.5897	48.56		7.47008	9.31078		16.4549	20.4109		1.20833	2.19
	45.2139	56.52		18.3523	10.8058		21.4429	24.4306		1.55944	1.51
	44.1852	33.65		9.10578	13.283		21.0318	14.077		1.65951	1.87
	41.0724	54.15		7.99794	6.99355		17.2678	7.89998		1.63406	1.94
	47.8935	68.05		7.74798	3.68751		16.0179	23.7575		1.67029	1.62
	27.8784	57.74		8.43392	12.6847		18.5136	22.7543		1.22173	2.49
	52.02	51.65		5.22079	11.7462		12.2217	27.0516		1.56391	1.13
	53.3	57.62		5.28619	13.9396		11.079	23.1661		1.12166	1.23
	68.07	65.46		8.63662	12.0604		17.5191			1.29	1.66
	43.56	66.97		11.3034			21.1155			1.72	1.4
	69.21	37.02		9.0969			19.6626			1.43	2.3
	60.08	49.03		8.85303			18.908			1.51	1.18
	39.32	51.48		11.1636			22.8815			1.22	1.56
	45.02	43.25		11.4177			20.8096			1.17	1.52
	76.2	39.24		10.3922			23.8047			1.54	1.28308
	54.3	53.1916		8.6198			14.7135			1.14	2.04968
	49.78	41.5932								1.45	1.55816
	68.82	38.2627								1.36	1.31729
	51.83	41.373								1.5	1.03687
	37.87	14.3277								1.73	0.786012
	45.19	23.0179								1.49	1.09934
	45.82	46.0727								1.64	1.32441
	22.945	41.5336								1.56	0.996766
	37.8606	40.9965								1.06353	1.0915
	51.5814	44.7618								1.19182
	25.4698									1.16772
	42.3043									1.2993
	15.9175									1.38328
	34.2098									1.1548
	33.2263									1.15873
	33.19									1.40732
	50.1072									1.65751
										1.15609

## Sheet: Figure 3D
		Heart weight/tibia length (mg/mm)
		WT															MKK6 KO
	4 weeks	4.92792	5.19284	5.42589	5.70216	5.35948	5.04728	4.22152	4.30727	5.13451	4.43092	4.44038					4.9708	4.60526	4.64573	3.86154	5.53906	4.21348	5.18968	5.14874
	6 weeks	5.62389	5.27564	6.31676	5.48996												6.96521	6.75659	6.80323	6.60763	6.38608
	9 weeks	6.55274	6	5.96431	7.00396	6.03676	6.42442	6.06897	6.01976								6.82868	6.92814	8.29638	9.45444	7.40827	9.07305	6.57973
	11 weeks	6.55271	7.00285	7.03661	6.74603	6.86761	6.4314	6.25568	7.13961	6.2493							8.62436	7.63564	7.38604	7.10465	8.3
	15 weeks	6.38	7.08	7.42	7.87	6.75	7.08	5.47	7.61	6.54	7.31	7.1	6.74	6.47	7.1	6.65	9.01	8.4	8.54	8.27507	9.48478	7.9823	11.1434	9.55631	9.30399	6.41176	6.1	6.24571	11.3486	5.4
	Figure 3D
	Figure ID	Normality	(Non-)Parametric testing	Post-hoc test				Effective
				Test	Comparison	Summary	P-value	Group	n
	Figure 3D	No	2-way ANOVA	Sidak's multiple comparisons test	P-interaction between age and genotype	*	0.0424	WT 4 weeks	11
					P-genotype	***	<0.0001	MKK6 KO 4 weeks	8
					P-age	***	<0.0001	WT 6 weeks	4
					MKK6 KO 4 weeks vs WT 4 weeks	ns	0.9983	MKK6 KO 6 weeks	5
					MKK6 KO 6 weeks vs WT 6 weeks	ns	0.413	WT 9 weeks	8
					MKK6 KO 9 weeks vs WT 9 weeks	**	0.0094	MKK6 KO 9 weeks	7
					MKK6 KO 11 weeks vs WT 11 weeks	ns	0.158	WT 11 weeks	9
					MKK6 KO 15 weeks vs WT 15 weeks	***	0.0003	MKK6 KO 11 weeks	5
								WT 15 weeks	15
								MKK6 KO 15 weeks	14

## Sheet: Figure 3E
		Cardiomyocyte area (µm^2)
		WT					MKK6 KO
	4 weeks	170.702	195.108	226.652	192.197		119.576	151.725	144.132	153.218
	6 weeks	273.44	276.934	303.814	285.73		244.625	265.209	255.002	283.658	234.084	259.428
	9 weeks	322.224	321.4	298.205	394.508	303.844	360.731	318.853	315.4	413.001	381.162
	11 weeks	304.225	286.727	303.798	299.878	296.323	420.465	344.029	392.278	356.554	324.894
	15 weeks	388.058	323.473	325.565	315.725	272.891	444.392	385.501	390.806	388.058	360.471	365.634
	Figure 3E
	Figure ID	Normality	(Non-)Parametric testing	Post-hoc test				Effective
				Test	Comparison	Summary	P-value	Group	n
	Figure 3E	No	2-way ANOVA	Sidak's multiple comparisons test	P-interaction between age and genotype	***	<0.0001	WT 4 weeks	4
					P-genotype	ns	0.066	MKK6 KO 4 weeks	4
					P-age	***	<0.0001	WT 6 weeks	4
					MKK6 KO 4 weeks vs WT 4 weeks	ns	0.0693	MKK6 KO 6 weeks	6
					MKK6 KO 6 weeks vs WT 6 weeks	ns	0.5651	WT 9 weeks	5
					MKK6 KO 9 weeks vs WT 9 weeks	ns	0.4742	MKK6 KO 9 weeks	5
					MKK6 KO 11 weeks vs WT 11 weeks	**	0.0034	WT 11 weeks	5
					MKK6 KO 15 weeks vs WT 15 weeks	**	0.0051	MKK6 KO 11 weeks	5
								WT 15 weeks	5
								MKK6 KO 15 weeks	6

## Sheet: Figure 3-figure supplement 1A
		Systolic blood pressure (mmHg)
		WT					MKK6 KO
	6 weeks	121.625	112.273	124.9	102	104.417	88.7	91.2	83.9889	106.118
	9 weeks	105.231	113.5	135.067	102.875	105.357	92.8125	83.3571	90.3333	95.8	88	114.214
	11 weeks	103.143	112.231	119	111.974	120.2	94.5714	106.929	113.625	98.2857	105.704	108.16	111.321
	15 weeks	121.5	121	116	122	129	99	106.5	115	103	107
	Figure 3 - figure supplement 1A
	Figure ID	Normality	(Non-)Parametric testing	Post-hoc test				Effective
				Test	Comparison	Summary	P-value	Group	n
	Figure 3 - figure supplement 1A	No	2-way ANOVA	Sidak's multiple comparisons test	P-interaction between age and genotype	ns	0.3756	WT 6 weeks	5
					P-age	*	0.0216	MKK6 KO 6 weeks	4
					P-genotype	***	<0.0001	WT 9 weeks	5
					MKK6 KO 6 weeks vs WT 6 weeks	**	0.0059	MKK6 KO 9 weeks	6
					MKK6 KO 9 weeks vs WT 9 weeks	**	0.0066	WT 11 weeks	5
					MKK6 KO 11 weeks vs WT 11 weeks	ns	0.457	MKK6 KO 11 weeks	7
					MKK6 KO 15 weeks vs WT 15 weeks	*	0.0311	WT 15 weeks	5
								MKK6 KO 15 weeks	5

## Sheet: Figure 3 - figure supplement 1B
	Picrosirius red positive area (%)			Figure 3 - figure supplement 1B
	WT	MKK6 KO		Figure ID	Normality	(Non-)Parametric testing	Post-hoc test			Effective
	0.2	0.23					Comparison	Summary	P-value	Group	n
	0.21	0.24		Figure 3 - figure supplement 1B	Yes	Unpaired t-test	MKK6 KO vs WT	ns	0.4953	WT	4
	0.41	0.26								MKK6 KO	3
	0.33

## Sheet: Figure 3 - figure supplement 1C
	Col1a1 relative expression			Col3a1 relative expression			Fn1 relative expression			Figure 3 - figure supplement 1C
	WT	MKK6 KO		WT	MKK6 KO		WT	MKK6 KO		Figure ID	Normality	(Non-)Parametric testing	Post-hoc test			Effective
	1.57047	1.24558		1.05083	0.864342		1.15648	1.52108					Comparison	Summary	P-value	Group	n
	1.92894	0.584668		1.87162	0.586582		1.66173	0.893743		Figure 3 - figure supplement 1C Col1a1	Yes	Unpaired t-test	MKK6 KO vs WT	ns	0.244	WT	8
	1.02221	0.450565		1.25598	0.436153		1.15738	0.582677								MKK6 KO	8
	0.89722	0.60916		1.00168	0.602507		1.35864	0.805112		Figure 3 - figure supplement 1C Col3a1	Yes	Unpaired t-test	MKK6 KO vs WT	ns	0.1725	WT	8
	0.59789	1.00739		0.892148	1.12021		0.794881	0.934075								MKK6 KO	8
	0.477239	0.717908		0.614141	0.71077		0.614667	0.709271		Figure 3 - figure supplement 1C Fn1	Yes	Unpaired t-test	MKK6 KO vs WT	ns	0.726	WT	8
	0.681481	0.526288		0.817173	0.73136		0.568139	0.730864								MKK6 KO	8
	0.824545	0.89252		0.496431	0.986092		0.688083	1.30912

## Sheet: Figure 3 - figure supplement 1D
	Nppa relative expression			Nppb relative expression			Acta2 relative expression			Myh7 relative expression			Figure 3 - figure supplement 1D
	WT	MKK6 KO		WT	MKK6 KO		WT	MKK6 KO		WT	MKK6 KO		Figure ID	Normality	(Non-)Parametric testing	Post-hoc test			Effective
	0.316138	2.62902		0.603561	1.21543		0.408178	0.976849		0.614496	1.36665					Comparison	Summary	P-value	Group	n
	3.37846	1.03054		1.87332	0.759514		1.86364	0.858145		1.84577	0.740091		Figure 3 - figure supplement 1D Nppa	No	Mann Whitney test	MKK6 KO vs WT	ns	0.7984	WT	8
	1.19612	0.422489		1.27397	0.432233		1.21434	0.889186		2.19332	0.599429								MKK6 KO	8
	1.32116	0.804337		1.77356	1.72458		1.48145	1.32845		1.49667	1.55401		Figure 3 - figure supplement 1D Nppb	Yes	Unpaired t-test	MKK6 KO vs WT	ns	0.4021	WT	8
	0.600745	0.432235		0.996203	0.366695		1.10726	0.42582		0.532479	0.737958								MKK6 KO	8
	0.326533	1.75846		0.386686	0.123723		0.524567	0.138199		0.23715	0.659654		Figure 3 - figure supplement 1D Acta2	Yes	Unpaired t-test	MKK6 KO vs WT	ns	0.5116	WT	8
	0.685177	0.312889		0.695334	0.342154		0.805993	0.411981		0.628639	0.295493								MKK6 KO	8
	0.17567	0.610331		0.397367	1.07534		0.594572	1.6191		0.451473	2.98683		Figure 3 - figure supplement 1D Myh7	No	Mann Whitney test	MKK6 KO vs WT	ns	0.5737	WT	8
																			MKK6 KO	8
