# Supplementary material for: MKK6 deficiency promotes cardiac dysfunction through MKK3-p38γ/δ-mTOR hyperactivation
Source: eLife. 2022 Aug 16;11:e75250. doi: 10.7554/eLife.75250 (PMC9381040; doi:10.7554/eLife.75250)
Supplement: Figure 4—source data 1. [file elife-75250-fig4-data1.xlsx]

## Sheet: Figure 4A
	Heart weight/tibia length (mg/mm)			Figure 4A
	MCK-Cre	MKK6 MCK-KO		Figure ID	Normality	(Non-)Parametric testing	Post-hoc test				Effective
	4.83271	6.66286					Comparison		Summary	P-value	Group	n
	5.6328	6.98487		Figure 4A	Yes	Unpaired t-test	MKK6 MCK-KO vs MCK-Cre		*	0.0289	MCK-Cre	5
	5.34111	5.96288									MKK6 MCK-KO	8
	5.94161	6.16312
	6.28505	5.91176
		5.91404
		6.04762
		6.55926

## Sheet: Figure 4C
	Cardiomyocyte area (µm^2)			Figure 4C
	MCK-Cre	MKK6 MCK-KO		Figure ID	Normality	(Non-)Parametric testing	Post-hoc test				Effective
	182.412	372.998					Comparison		Summary	P-value	Group	n
	221.167	343.47		Figure 4C	Yes	Unpaired t-test	MKK6 MCK-KO vs MCK-Cre		*	0.0289	MCK-Cre	4
	292.356	315.351									MKK6 MCK-KO	5
	275.244	307.498
		501.947

## Sheet: Figure 4D
	Heart weight/tibia length (mg/mm)			Figure 4D
	aMHC-Cre	MKK6aMHC-KO		Figure ID	Normality	(Non-)Parametric testing	Post-hoc test				Effective
	5.4919	6.13113					Comparison		Summary	P-value	Group	n
	5.75635	6.11046		Figure 4D	Yes	Unpaired t-test	MKK6aMHC-KO vs aMHC-Cre		*	0.0132	aMHC-Cre	5
	5.71834	5.9331									MKK6aMHC-KO	7
	5.68628	5.99319
	5.97319	5.80057
		6.51827
		6.12536

## Sheet: Figure 4F
	Cardiomyocyte area (µm^2)			Figure 4F
	aMHC-Cre	MKK6aMHC-KO		Figure ID	Normality	(Non-)Parametric testing	Post-hoc test				Effective
	409.258	410.337					Comparison		Summary	P-value	Group	n
	367.798	472.097		Figure 4F	Yes	Unpaired t-test	MKK6aMHC-KO vs aMHC-Cre		**	0.0047	aMHC-Cre	6
	327.46	512.876									MKK6aMHC-KO	6
	331.317	371.574
	276.657	427.507
	330.599	540.019

## Sheet: Figure 4 - figure supplement 2A
	Weeks	Control	MKK6aMHC-KO
	39	0
	39	0
	39	0
	38	0
	38	0			Figure 4 - figure supplement 2A
	38	0			Figure ID	Test	Comparison	Summary	P-value	Effective
	38	0								Group	n
	39	0			Figure 4 - figure supplement 2A	Gehan-Breslow-Wilcoxon test	MKK6aMHC-KO vs Control	*	0.0351	Control	19
	39	0								MKK6aMHC-KO	16
	39	0
	39	0
	38	0
	39	0
	39	0
	39	0
	39	0
	39	0
	65	0
	65	0
	50		0
	50		0
	48		1
	50		0
	51		1
	27		1
	44		1
	47		1
	51		1
	27		1
	53		0
	50		0
	45		1
	23		0
	23		0
	23		0

## Sheet: Figure 4 - figure supplement 2B
	LV wall thickness;d (mm)			LVID;d (mm)			LVID;s (mm)			LV volume;d (µL)			LV volume;s (µL)
	Control	MKK6aMHC-KO		Control	MKK6aMHC-KO		Control	MKK6aMHC-KO		Control	MKK6aMHC-KO		Control	MKK6aMHC-KO
	0.910473	0.728379		3.98953	4.88345		2.99628	4.61858		69.5654	111.928		34.8941	98.2595
	0.91875	0.769764		3.59223	3.95642		2.2348	3.22804		54.1504	68.2013		16.857	41.8367
	0.860811	0.877364		4.17162	4.58547		3.02939	3.80743		77.3286	96.6172		35.8437	62.2419
	0.993243	0.835979		3.95642	5.38007		2.51622	5.21453		68.2013	140.113		22.6835	130.347
	0.877365	0.720101		4.00608	5.42973		3.01284	5.08209		70.253	143.115		35.3672	122.801
	1.04291	0.811149		2.83074	4.20473		1.4402	3.44324		30.3554	78.7875		5.44521	48.9043
	0.869088	0.83598		4.38682	5.28074		3.57568	4.88345		87.0727	134.208		53.5532	111.928
	0.893919	0.761486		3.77432	5.67804		2.59899	5.26419		60.9574	158.631		24.5826	133.237
	1.0098	0.869088		3.50946	4.61858		2.36723	3.79088		51.2001	98.2595		19.4784	61.5978
	0.811149			4.46959			3.60878			90.9853			54.7513
	0.811149			4.40338			3.37703			87.8479			46.6656
	0.910473			3.87365			2.45			64.8543			21.2253
	Figure 4 - figure supplement 2B
	Figure ID	Normality	(Non-)Parametric testing	Post-hoc test				Effective
				Comparison		Summary	P-value	Group	n
	Figure 4 - figure supplement 2B LV wall thickness;d	Yes	Unpaired t-test	MKK6aMHC-KO vs Control		**	0.0018	Control	12
								MKK6aMHC-KO	9
	Figure 4 - figure supplement 2B LVID;d	Yes	Unpaired t-test	MKK6aMHC-KO vs Control		***	0.0004	Control	12
								MKK6aMHC-KO	9
	Figure 4 - figure supplement 2B LVID;s	Yes	Unpaired t-test	MKK6aMHC-KO vs Control		***	<0.0001	Control	12
								MKK6aMHC-KO	9
	Figure 4 - figure supplement 2B LV volume;d	Yes	Mann Whitney test	MKK6aMHC-KO vs Control		***	0.0003	Control	12
								MKK6aMHC-KO	9
	Figure 4 - figure supplement 2B LV volume;s	Yes	Mann Whitney test	MKK6aMHC-KO vs Control		***	<0.0001	Control	12
								MKK6aMHC-KO	9

## Sheet: Figure 4 - figure supplement 2C
	Ejection fraction (%)			Fractional shortening (%)			E/A wave velocities ratio (relative units)			Isovolumetric relaxation time (ms)
	Control	MKK6aMHC-KO		Control	MKK6aMHC-KO		Control	MKK6aMHC-KO		Control	MKK6aMHC-KO
	49.8399	12.2122		24.8963	5.42373		1.5584	1.1314		25.5556	20.2778
	68.87	38.6569		37.788	18.41		1.318	1.3293		25.8333	38.5
	53.6475	35.5789		27.381	16.9675		1.27089	0.898859		25.8333	31.25
	66.7403	6.97023		36.4017	3.07693		1.40048	1.41667		26.6667	37.2222
	49.6574	14.1941		24.7934	6.40244		1.80645	1.69946		27.9167	35
	82.0618	37.9288		49.1228	18.1102		1.12317			20.8333	37.5
	38.496	16.6011		18.4906	7.52351		1.32341			25.4167	22.5
	59.6725	16.0079		31.1404	7.28864		2.03693			17.9167
	61.9563	37.3111		32.5472	17.9212		1.38023			28.3333
	39.8241			19.2593			1.95331			32.7778
	46.879			23.3083			1.25934			23.3333
	67.2723			36.7521			1.1659			25.4167
	Figure 4 - figure supplement 2C
	Figure ID	Normality	(Non-)Parametric testing	Post-hoc test				Effective
				Comparison		Summary	P-value	Group	n
	Figure 4 - figure supplement 2C Ejection fraction	No	Mann Whitney test	MKK6aMHC-KO vs Control		***	<0.0001	Control	12
								MKK6aMHC-KO	9
	Figure 4 - figure supplement 2C Fractional shortening	No	Mann Whitney test	MKK6aMHC-KO vs Control		***	<0.0001	Control	12
								MKK6aMHC-KO	9
	Figure 4 - figure supplement 2C E/A wave velocities ratio	Yes	Unpaired t-test	MKK6aMHC-KO vs Control		ns	0.3079	Control	12
								MKK6aMHC-KO	5
	Figure 4 - figure supplement 2C Isovolumetric relaxation time	Yes	Unpaired t-test	MKK6aMHC-KO vs Control		*	0.0251	Control	12
								MKK6aMHC-KO	7
