# Supplementary material for: MKK6 deficiency promotes cardiac dysfunction through MKK3-p38γ/δ-mTOR hyperactivation
Source: eLife. 2022 Aug 16;11:e75250. doi: 10.7554/eLife.75250 (PMC9381040; doi:10.7554/eLife.75250)
Supplement: Figure 5—source data 2. [file elife-75250-fig5-data2.xlsx]

## Sheet: Figure 5A
	P-p38g/p38g relative expression
	WT	MKK6 KO		Figure 5A
	0.710603	3.62403		Figure ID	Normality	(Non-)Parametric testing	Post-hoc test			Effective
	0.897107	2.69781					Comparison	Summary	P-value	Group	n
	1.39229	3.47508		Figure 5A - P-p38g/p38g	Yes	Unpaired t-test	MKK6 KO vs WT	**	0.003	WT	3
										MKK6 KO	3
				Figure 5A - P-p38d/p38d	Yes	Unpaired t-test	MKK6 KO vs WT	ns	0.0568	WT	4
										MKK6 KO	4
	P-p38d/p38d relative expression
	WT	MKK6 KO
	1.49738	2.39491
	1.17183	1.64322
	0.406008	1.2388
	0.92478	1.85793

## Sheet: Figure 5B
	P-p38a/p38a relative expression
	WT	MKK6 KO		Figure 5B
	1.15751	0.190344		Figure ID	Normality	(Non-)Parametric testing	Post-hoc test			Effective
	1.24751	0.206489					Comparison	Summary	P-value	Group	n
	0.650179	0.292697		Figure 5B - P-p38a/p38a	Yes	Unpaired t-test	MKK6 KO vs WT	**	0.0012	WT	4
	0.944799	0.227143								MKK6 KO	4

## Sheet: Figure 5C
	P-MKK3/Vinculin relative expression
	WT	MKK6 KO		Figure 5C
	0.925711	2.11425		Figure ID	Normality	(Non-)Parametric testing	Post-hoc test			Effective
	1.24634	1.62395					Comparison	Summary	P-value	Group	n
	0.968476	1.91182		Figure 5C - P-MKK3/Vinculin	Yes	Unpaired t-test	MKK6 KO vs WT	***	0.0007	WT	4
	0.85947	1.78947								MKK6 KO	4

## Sheet: Figure 5E
	Heart weight/tibia length (mg/mm)			Figure 5E
	WT	MKK3 KO		Figure ID	Normality	(Non-)Parametric testing	Post-hoc test				Effective
	6.01976	6.12903					Comparison		Summary	P-value	Group	n
	6.29953	5.66168		Figure 5E	Yes	Unpaired t-test	MKK3 KO vs WT		**	0.0064	WT	13
	6.25365	5.13921									MKK3 KO	7
	6.13931	5.69861
	6.03751	5.90258
	5.94828	6.00225
	6.12922	6.20397
	6.55113
	6.2963
	6.42484
	6.55274
	6
	7.00396

## Sheet: Figure 5 - figure supplement 1A
	P-p38g/p38g relative expression
	WT	MKK3 KO		Figure 5 - figure supplement 1A
	1.35006	0.111853		Figure ID	Normality	(Non-)Parametric testing	Post-hoc test			Effective
	0.933409	0.813203					Comparison	Summary	P-value	Group	n
	1.04847	0.735261		P-p38g/p38g	Yes	Unpaired t-test	MKK3 KO vs WT	ns	0.084	WT	4
	0.668059	0.590187								MKK3 KO	4
				P-p38d/p38d	Yes	Unpaired t-test	MKK3 KO vs WT	ns	0.052	WT	4
										MKK3 KO	4
	P-p38d/p38d relative expression			P-p38a/p38a	No	Mann-Whitney test	MKK3 KO vs WT	ns	0.6857	WT	4
	WT	MKK3 KO								MKK3 KO	4
	1.13174	0.415864
	0.81725	0.688695
	1.05813	0.815849
	0.992884	0.885633
	P-p38a/p38a relative expression
	WT	MKK3 KO
	1.84037	2.01506
	0.609319	0.644273
	0.584268	0.736267
	0.966039	0.719987

## Sheet: Figure 5 - figure supplement 2A
	P-MKK3/Vinculin relative expression
	MCK-Cre	p38a MCK-KO		Figure 5 - figure supplement 2A
	0.951938	2.02366		Figure ID	Normality	(Non-)Parametric testing	Post-hoc test			Effective
	0.868382	1.68371					Comparison	Summary	P-value	Group	n
	1.3592	1.06388		P-MKK3/Vinculin	Yes	Unpaired t-test	p38a MCK-KO vs MCK-Cre	*	0.035	MCK-Cre	4
	0.82048	2.03622								p38a MCK-KO	4
				P-MKK6/Vinculin	Yes	Unpaired t-test	p38a MCK-KO vs MCK-Cre	***	<0.0001	MCK-Cre	4
										p38a MCK-KO	4
	P-MKK6/Vinculin relative expression			MKK3/Vinculin	No	Mann-Whitney test	p38a MCK-KO vs MCK-Cre	*	0.0282	MCK-Cre	4
	MCK-Cre	p38a MCK-KO								p38a MCK-KO	4
	0.927558	1.732		MKK6/Vinculin	Yes	Unpaired t-test	p38a MCK-KO vs MCK-Cre	***	<0.0001	MCK-Cre	4
	1.0013	1.55743								p38a MCK-KO	4
	1.0634	1.69204
	1.00773	1.7829
	MKK3/Vinculin relative expression
	MCK-Cre	p38a MCK-KO
	0.993016	1.12153
	0.986149	1.02807
	1.01052	1.07325
	1.01031	1.19573
	MKK6/Vinculin relative expression
	MCK-Cre	p38a MCK-KO
	0.84996	3.52836
	0.783301	3.4922
	1.1649	3.62041
	1.20184	3.18333

## Sheet: Figure 5 - figure supplement 2B
	Map2k3/Gapdh relative expression				Figure 5 - figure supplement 2B
	WT	MKK6 KO			Figure ID	Normality	(Non-)Parametric testing	Post-hoc test			Effective
	1.08939	1.18639						Comparison	Summary	P-value	Group	n
	0.830972	1.07632			Figure 5 - figure supplement 2B	Yes	Unpaired t-test	MKK6 KO vs WT	*	0.0265	WT	10
	0.878534	1.17786									MKK6 KO	8
	0.967463	1.01335
	1.18091	1.53029
	1.2032	1.41918
	0.852805	0.901929
	1.11102	1.38982
	1.07739
	0.808301

## Sheet: Figure 5 - figure supplemen 2C
	MKK3/Vinculin relative expression				Figure 5 - figure supplement 2C
	WT	MKK6 KO			Figure ID	Normality	(Non-)Parametric testing	Post-hoc test			Effective
	1.07662	1.52287						Comparison	Summary	P-value	Group	n
	1.0143	2.04957			MKK3/Vinculin	Yes	Unpaired t-test	MKK6 KO vs WT	*	0.0111	WT	3
	0.909079	2.16849									MKK6 KO	3
