# Supplementary material for: MKK6 deficiency promotes cardiac dysfunction through MKK3-p38γ/δ-mTOR hyperactivation
Source: eLife. 2022 Aug 16;11:e75250. doi: 10.7554/eLife.75250 (PMC9381040; doi:10.7554/eLife.75250)
Supplement: Figure 6—source data 1. [file elife-75250-fig6-data1.xlsx]

## Sheet: Figure 6A
	Heart weight/tibia length (mg/mm)					Figure 6A
	WT	MKK6 KO	p38g KO	MKK6/p38g DKO		Figure ID	Normality	(Non-)Parametric testing	Post-hoc test				Effective
	6.6119	8.29638	5.8	7.13333					Test	Comparison	Summary	P-value	Group	n
	6.29135	7.40827	5.71776	7.15663		Figure 6A	Yes	1-way ANOVA	Tukey's test	ANOVA	***	<0.0001	WT	5
	6.05617	9.07305	5.87708	6.41323						WT vs. MKK6 KO	**	0.0055	MKK6 KO	10
	7.2187	6.57973	5.93044	6.21021						WT vs. p38g KO	ns	0.4511	p38g KO	7
	6.16774	9.45444	5.59495	6.24853						WT vs. MKK6/p38g DKO	ns	0.9999	MKK6/p38g DKO	7
		7.11268	5.7074	6.62687						MKK6 KO vs. p38g KO	***	<0.0001
		7.16825	5.6151	5.74356						MKK6 KO vs. MKK6/p38g DKO	**	0.0025
		6.83575								p38g KO vs. MKK6/p38g DKO	ns	0.3316
		9.3932
		9.96993

## Sheet: Figure 6C
	Cardiomyocyte area (µm^2)				Figure 6C
	WT	p38g KO	MKK6/p38g DKO		Figure ID	Normality	(Non-)Parametric testing	Post-hoc test				Effective
	336.041	274.827	297.113					Test	Comparison	Summary	P-value	Group	n
	347.496	260.778	292.659		Figure 6C	Yes	1-way ANOVA	Tukey's test	ANOVA	ns	0.0677	WT	5
	235.4	237.058	416.08						WT vs. p38g KO	ns	0.1455	p38g KO	4
	299.272	244.626	303.009						WT vs. MKK6/p38g DKO	ns	0.8778	MKK6/p38g DKO	5
	382.162		365.354						p38g KO vs. MKK6/p38g DKO	ns	0.0685

## Sheet: Figure 6D
	Heart weight/tibia length (mg/mm)					Figure 6D
	MCK-Cre	MKK6 KO	p38dMCK-KO	MKK6 KO/ p38dMCK-KO		Figure ID	Normality	(Non-)Parametric testing	Post-hoc test				Effective
	6.41348	8.29638	5.37697	5.9474					Test	Comparison	Summary	P-value	Group	n
	7	7.40827	4.84461	5.48996		Figure 6D	No	Kruskall-Wallis test	Dunn's test	Kruskall-Wallis test	***	<0.0001	MCK-Cre	8
	6.92218	9.07305	6.19571	5.48204						MCK-Cre vs. MKK6 KO	ns	0.918	MKK6 KO	10
	6.91142	6.57973	5.40142	5.89819						MCK-Cre vs. p38dMCK-KO	*	0.0143	p38dMCK-KO	8
	6.25	9.45444	5.58788	6.0899						MCK-Cre vs. MKK6 KO/ p38dMCK-KO	ns	0.134	MKK6 KO/ p38dMCK-KO	8
	6.9914	7.11268	5.4881	5.8982						MKK6 KO vs. p38dMCK-KO	***	<0.0001
	6.94828	7.16825	5.38095	5.09091						MKK6 KO vs. MKK6 KO/ p38dMCK-KO	***	0.0007
	6.35465	6.83575	5.27794	5.81982						p38dMCK-KO vs. MKK6 KO/ p38dMCK-KO	ns	>0.9999
		9.3932						Mann-Whitney test	-	MKK6 KO vs MCK-Cre	##	0.0062
		9.96993

## Sheet: Figure 6F
	Heart weight/tibia length (mg/mm)				Figure 6F
	MCK-Cre	p38dMCK-KO	MKK6 KO/ p38dMCK-KO		Figure ID	Normality	(Non-)Parametric testing	Post-hoc test				Effective
	401.968	172.956	201.523					Test	Comparison	Summary	P-value	Group	n
	387.582	248.878	255.175		Figure 6F	Yes	1-way ANOVA	Tukey's test	ANOVA	***	<0.0001	MCK-Cre	5
	386.985	249.093	208.095						MCK-Cre vs. p38dMCK-KO	***	<0.0001	p38dMCK-KO	5
	389.688	270.611	219.924						MCK-Cre vs. MKK6 KO/ p38dMCK-KO	***	<0.0001	MKK6 KO/ p38dMCK-KO	5
	353.089	223.541	202.084						p38dMCK-KO vs. MKK6 KO/ p38dMCK-KO	ns	0.647
