# Supplementary material for: MKK6 deficiency promotes cardiac dysfunction through MKK3-p38γ/δ-mTOR hyperactivation
Source: eLife. 2022 Aug 16;11:e75250. doi: 10.7554/eLife.75250 (PMC9381040; doi:10.7554/eLife.75250)
Supplement: Figure 7—source data 2. [file elife-75250-fig7-data2.xlsx]

## Sheet: Figure 7A
	P-S6 S235/236 /S6 (relative units)			Figure 7A
	WT	MKK6 KO		Figure ID	Normality	(Non-)Parametric testing	Post-hoc test				Effective
	1.08125	11.7174					Comparison		Summary	P-value	Group	n
	1.75524	9.14584		P-S6 S235/236 / S6	Yes	Unpaired t-test	MKK6 KO vs WT		***	<0.0001	WT	4
	0.494892	8.48686									MKK6 KO	4
	0.668617	8.51423		P-S6 S240/244 / S6	Yes	Unpaired t-test	MKK6 KO vs WT		**	0.0038	WT	4
											MKK6 KO	4
				P-FoxO1/3a / FoxO1	Yes	Unpaired t-test	MKK6 KO vs WT		*	0.0173	WT	4
	P-S6 S240/244 / S6 (relative units)										MKK6 KO	4
	WT	MKK6 KO
	0.961354	4.28073
	2.03681	4.89685
	0.419621	4.03886
	0.582213	2.44043
	P-FoxO1/3a / FoxO1 (relative units)
	WT	MKK6 KO
	0.960734	2.06222
	1.60427	2.01407
	0.707528	1.57933
	0.727467	2.93124

## Sheet: Figure 7B
	P-eEF2K/Vinculin (relative units)			Figure 7B
	WT	MKK6 KO		Figure ID	Normality	(Non-)Parametric testing	Post-hoc test				Effective
	0.912575	1.29958					Comparison		Summary	P-value	Group	n
	1.2389	2.33321		P-eEF2K/Vinculin	Yes	Unpaired t-test	MKK6 KO vs WT		*	0.0227	WT	4
	0.535232	2.47128									MKK6 KO	4
	1.3133	3.26508		P-eEF2/Vinculin	Yes	Unpaired t-test	MKK6 KO vs WT		*	0.0128	WT	4
											MKK6 KO	4
				P-eIF4G/Vinculin	No	Mann-Whitney test	MKK6 KO vs WT		ns	0.0571	WT	4
	P-eEF2/Vinculin (relative units)										MKK6 KO	4
	WT	MKK6 KO		P-eIF4B/Vinculin	Yes	Unpaired t-test	MKK6 KO vs WT		**	0.0032	WT	4
	0.962911	0.385984									MKK6 KO	4
	1.07309	0.458531		eIF4B/Vinculin	Yes	Unpaired t-test	MKK6 KO vs WT		ns	0.3534	WT	4
	1.39465	0.422768									MKK6 KO	4
	0.569348	0.296366
	P-eIF4G/Vinculin (relative units)
	WT	MKK6 KO
	0.592109	1.43399
	2.43146	3.11534
	0.5367	8.72323
	0.439729	12.4313
	P-eIF4B/Vinculin (relative units)
	WT	MKK6 KO
	1.04889	2.262
	1.22452	1.85826
	1.23095	1.89236
	0.49564	1.80893
	eIF4B/Vinculin (relative units)
	WT	MKK6 KO
	0.598831	0.726476
	1.27195	0.587625
	1.58294	0.370653
	0.546283	1.11252

## Sheet: Figure 7C
	Puromycin/Vinculin (relative units)			Figure 7C
	WT	MKK6 KO		Figure ID	Normality	(Non-)Parametric testing	Post-hoc test				Effective
	0.973694	10.5518					Comparison		Summary	P-value	Group	n
	1.58064	8.23608		Puromycin/Vinculin	No	Mann-Whitney test	MKK6 KO vs WT		ns	0.0571	WT	3
	0.445664	7.64264									MKK6 KO	4
	0.602108	7.66729

## Sheet: Figure 7D
	Protein/DNA ratio (relative units)			Figure 7D
	WT	MKK6 KO		Figure ID	Normality	(Non-)Parametric testing	Post-hoc test				Effective
	0.873195	2.61547					Comparison		Summary	P-value	Group	n
	0.788389	2.65459		Figure 7D	No	Mann Whitney test	MKK6 KO vs WT		**	0.0062	WT	8
	0.751644	1.80517									MKK6 KO	5
	0.806548	2.81162
	1.1146	1.84686
	1.86014
	1.15413
	0.714781

## Sheet: Figure 7E
		Heart weight/tibia length (mg/mm)
		WT							MKK6 KO
	Saline	6.47389	7.30278	5.90963	6.07798	6.36523	5.89296	6.29866	6.45745	7.35206	6.94706	7.45379	8.65027	6.60299	9.72121
	Rapamycin	5.39007	5.14391	5.40313	5.47125	5.33373			5.34098	4.78261	4.69956	5.26486	5.16892	4.80137
	Figure 7E
	Figure ID	Normality	(Non-)Parametric testing	Post-hoc test				Effective
				Test	Comparison	Summary	P-value	Group	n
	Figure 7E	No	2-way ANOVA	Tukey's multiple comparisons test	P-interaction between treatment and genotype	**	0.0098	WT Vehicle	7
					P-genotype	ns	0.1154	WT Rapamycin	5
					P-treatment	***	<0.0001	MKK6 KO Vehicle	7
					MKK6 KO Saline vs WT Saline	*	0.0136	MKK6 KO Rapamycin	6
					MKK6 KO Rapamycin vs WT Rapamycin	ns	0.8536
					WT Rapamycin vs WT Saline	ns	0.1076
					MKK6 KO Rapamycin vs MKK6 KO Saline	***	<0.0001
		Yes	Unpaired t-test	-	WT Rapamycin vs WT Saline	**	0.0014

## Sheet: Figure 7G
		Cardiomyocyte area (µm^2)
		WT				MKK6 KO
	Saline	262.076	323.641	311.188	328.153	336.345	323.1	401.246	344.248
	Rapamycin	227.027	248.585	225.111	212.521	194.144	219.777	175.685	192.083
	Figure 7G
	Figure ID	Normality	(Non-)Parametric testing	Post-hoc test				Effective
				Test	Comparison	Summary	P-value	Group	n
	Figure 7G	Yes	2-way ANOVA	Tukey's multiple comparisons test	P-interaction between treatment and genotype	*	0.0107	WT Vehicle	4
					P-genotype	***	<0.0001	WT Rapamycin	4
					P-treatment	ns	0.648	MKK6 KO Vehicle	4
					MKK6 KO Saline vs WT Saline	ns	0.117	MKK6 KO Rapamycin	4
					MKK6 KO Rapamycin vs WT Rapamycin	ns	0.3187
					WT Rapamycin vs WT Saline	**	0.0052
					MKK6 KO Rapamycin vs MKK6 KO Saline	***	<0.0001

## Sheet: Figure 7 - figure supplement 1A
	DEPTOR/Vinculin (relative units)			Figure 7 - figure supplement 1A
	WT	MKK6 KO		Figure ID	Normality	(Non-)Parametric testing	Post-hoc test				Effective
	1.17732	0.552847					Comparison		Summary	P-value	Group	n
	0.685522	0.483286		DEPTOR/Vinculin	Yes	Unpaired t-test	MKK6 KO vs WT		**	0.0073	WT	3
	1.13716	0.593591									MKK6 KO	5
		0.323725
		0.443056

## Sheet: Figure 7 - figure supplement 2A
	MEF cell area (µm^2)				Figure 7 - figure supplement 2A
	WT Lv GFP	MKK6 KO Lv GFP	MKK6 KO Lv p38a*		Figure ID	Normality	(Non-)Parametric testing	Post-hoc test				Effective
	250	620	1396.67					Comparison		Summary	P-value	Group	n
	410	1006.67	453.333		Figure 7 - figure supplement 2A	Yes	Unpaired t-test	MKK6 KO Lv GFP vs WT Lv GFP		*	0.0468	WT Lv GFP	39
	2296.67	1983.33	666.667									MKK6 KO Lv GFP	40
	836.667	1410	146.667			No	Mann-Whitney test	MKK6 KO Lv p38a* vs MKK6 KO Lv GFP		*	0.0267	MKK6 KO Lv p38a*	41
	966.667	1466.67	390
	796.667	1616.67	1466.67			No	Mann-Whitney test	MKK6 KO Lv p38a* vs WT Lv GFP		ns	0.8426
	1026.67	2770	543.333
	333.333	656.667	393.333
	1070	1093.33	1490
	2260	333.333	1380
	2140	2170	1440
	1263.33	3166.67	1870
	2193.33	1293.33	333.333
	453.333	620	1086.67
	890	616.667	640
	936.667	283.333	850
	1253.33	1606.67	1170
	1910	2410	1690
	1186.67	946.667	1573.33
	1310	1106.67	1280
	1140	1423.33	1076.67
	1460	1926.67	1580
	1536.67	406.667	810
	1083.33	2353.33	1513.33
	493.333	2036.67	1656.67
	1013.33	2073.33	586.667
	1916.67	1673.33	950
	900	1760	813.333
	1746.67	700	1253.33
	1450	1416.67	573.333
	490	1466.67	1703.33
	716.667	1703.33	1800
	830	853.333	1700
	1396.67	1666.67	1483.33
	580	1540	1680
	700	2380	1650
	933.333	3510	650
	1036.67	510	610
	2463.33	673.333	796.667
		2126.67	356.667
			1780

## Sheet: Figure 7 - figure supplemen 2B
	P-p70 S6K/p70 S6K (relative units)				Figure 7 - figure supplement 2B
	WT Lv GFP	MKK6 KO Lv GFP	MKK6 KO Lv p38a*		Figure ID	Normality	(Non-)Parametric testing	Post-hoc test					Effective
	1.26785	1.81541	0.536823					Test	Comparison		Summary	P-value	Group	n
	0.765713	1.51468	0.563086		P-70 S6K/p70 S6K	Yes	1-way ANOVA	Tukey's post test	ANOVA		***	0.0007	WT Lv GFP	4
	1.3277	2.55263	0.457031						MKK6 KO Lv GFP vs WT Lv GFP		*	0.0228	MKK6 KO Lv GFP	6
	0.63874	1.27828	0.444323										MKK6 KO Lv p38a*	4
		1.5047							MKK6 KO Lv p38a* vs MKK6 KO Lv GFP		***	0.0006
		1.64691
									MKK6 KO Lv p38a* vs WT Lv GFP		ns	0.157
	p70 S6K/Vinculin (relative units)				p70 S6K/Vinculin	Yes	1-way ANOVA	Tukey's post test	ANOVA		ns	0.4165	WT Lv GFP	4
	WT Lv GFP	MKK6 KO Lv GFP	MKK6 KO Lv p38a*						MKK6 KO Lv GFP vs WT Lv GFP		*	0.0228	MKK6 KO Lv GFP	6
	1.00312	0.848424	0.881913										MKK6 KO Lv p38a*	4
	1.40584	0.907907	0.949553						MKK6 KO Lv p38a* vs MKK6 KO Lv GFP		***	0.0006
	0.773085	0.852307	0.672229
	0.817957	0.890582	0.875204						MKK6 KO Lv p38a* vs WT Lv GFP		ns	0.157
		0.850059
		0.972498

## Sheet: Figure 7 - figure supplement 4A
	P-p38g/p38g (relative units)			Figure 7 - figure supplement 3A
	MKK6 KO	MKK3/6MCK-KO		Figure ID	Normality	(Non-)Parametric testing	Post-hoc test				Effective
	0.608116	0.193543					Comparison		Summary	P-value	Group	n
	1.58802	0.185573		P-p38g/p38g	Yes	Unpaired t-test	MKK3/6MCK-KO vs MKK6 KO		**	0.009	MKK6 KO	4
	1.03194	0.168853									MKK3/6MCK-KO	4
	0.771915	0.195356		p38g/Vinculin	Yes	Unpaired t-test	MKK3/6MCK-KO vs MKK6 KO		ns	0.7305	MKK6 KO	4
											MKK3/6MCK-KO	4
	p38g/Vinculin (relative units)
	MKK6 KO	MKK3/6MCK-KO
	1.02193	0.990771
	0.908949	0.975353
	1.05875	1.24595
	1.01037	0.905143

[truncated: 2 more sheets: Figure 7 - figure supplement 4B, Figure 7 - figure supplement 4C]
